# Supplementary material
Source: PubMed Central journal article supplement (PMC8361336)

# The Importance of Physical Activity

Engaging in physical activity in older adulthood is protective for cognitive functioning and increased healthspan

Based on over  
**52,000**  
participants  
from North America and Europe

Especially important prior to onset

THE BENEFITS OF  
**MODERATE**  
PHYSICAL  
ACTIVITY

Also protective after onset of cognitive impairment

FOR EXAMPLE

**3x**  
50 MIN  
PER WEEK

AS LITTLE AS  
**150**  
MIN  
PER WEEK

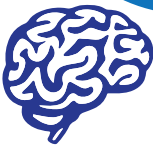

**Reduces the risk**  
of  
cognitive impairment

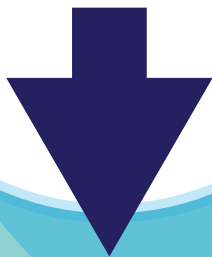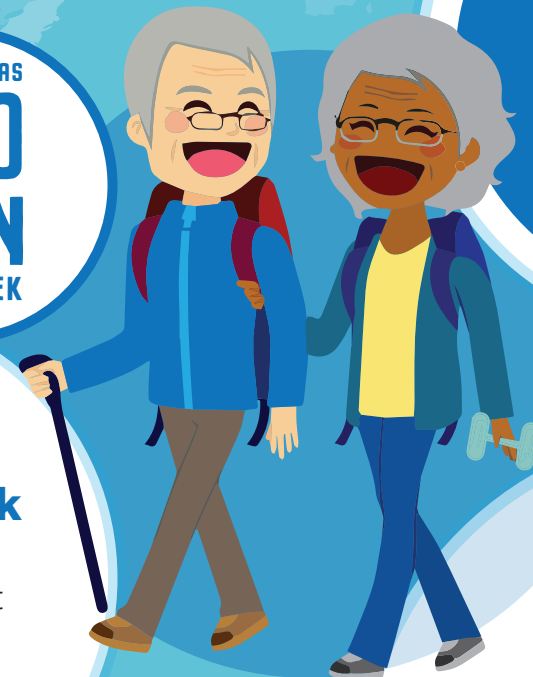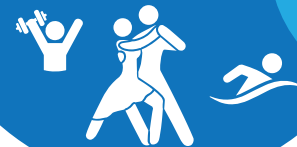

**Increases**  
life expectancy

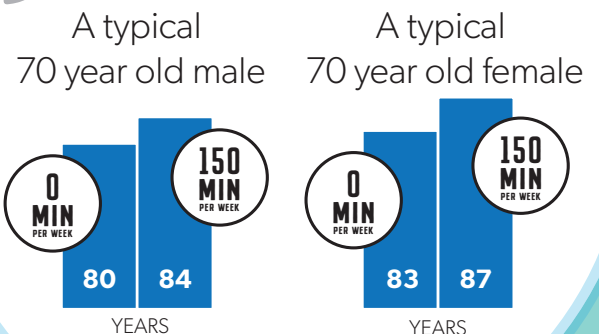

Supplement: glaa268_suppl_supplementary_figure.pdf [file glaa268_suppl_supplementary_figure.pdf]
